# Supplementary material for: Density Functional Theory (DFT) Study of Coumarin-based Dyes Adsorbed on TiO2 Nanoclusters—Applications to Dye-Sensitized Solar Cells
Source: Materials (Basel). 2013 Jun 10;6(6):2372–92. doi: 10.3390/ma6062372 (PMC5458949; doi:10.3390/ma6062372)

## Article

## Supplementary Information

**Table S1.** Wavelength and oscillator strength of the main transitions in the spectrum for the three coumarin-based dyes, in neutral and deprotonated anionic form, calculated by TD-DFT (at B3LYP/DZVP level) in various solvents.

| Dye      | Dye form     | Solvent  | Wavelength (nm) | Oscillator strength |
|----------|--------------|----------|-----------------|---------------------|
| C343     | Deprotonated | water    | 413.57          | 0.5373              |
|          |              | methanol | 405.24          | 0.5564              |
|          |              | ethanol  | 404.89          | 0.5658              |
|          | Neutral      | water    | 423.67          | 0.7468              |
|          |              | methanol | 419.77          | 0.7352              |
|          |              | ethanol  | 420.56          | 0.7457              |
| NKX-2398 | Deprotonated | water    | 438.11          | 0.7819              |
|          |              | methanol | 435.00          | 0.8136              |
|          |              | ethanol  | 435.63          | 0.8195              |
|          | Neutral      | water    | 454.22          | 1.0980              |
|          |              | methanol | 449.83          | 1.0963              |
|          |              | ethanol  | 450.39          | 1.1072              |
| NKX-2311 | Deprotonated | water    | 490.55          | 1.4381              |
|          |              | methanol | 488.06          | 1.4755              |
|          |              | ethanol  | 488.53          | 1.4894              |
|          | Neutral      | water    | 534.67          | 1.5050              |
|          |              | methanol | 530.48          | 1.5270              |
|          |              | ethanol  | 531.72          | 1.5417              |

**Figure S1.** Simulated UV-Vis absorption spectra of neutral and deprotonated C343 dyes, calculated by TD-DFT, in various solvents. The spectral lines were convoluted with Gaussian distributions of 20 nm linewidth at half maximum.

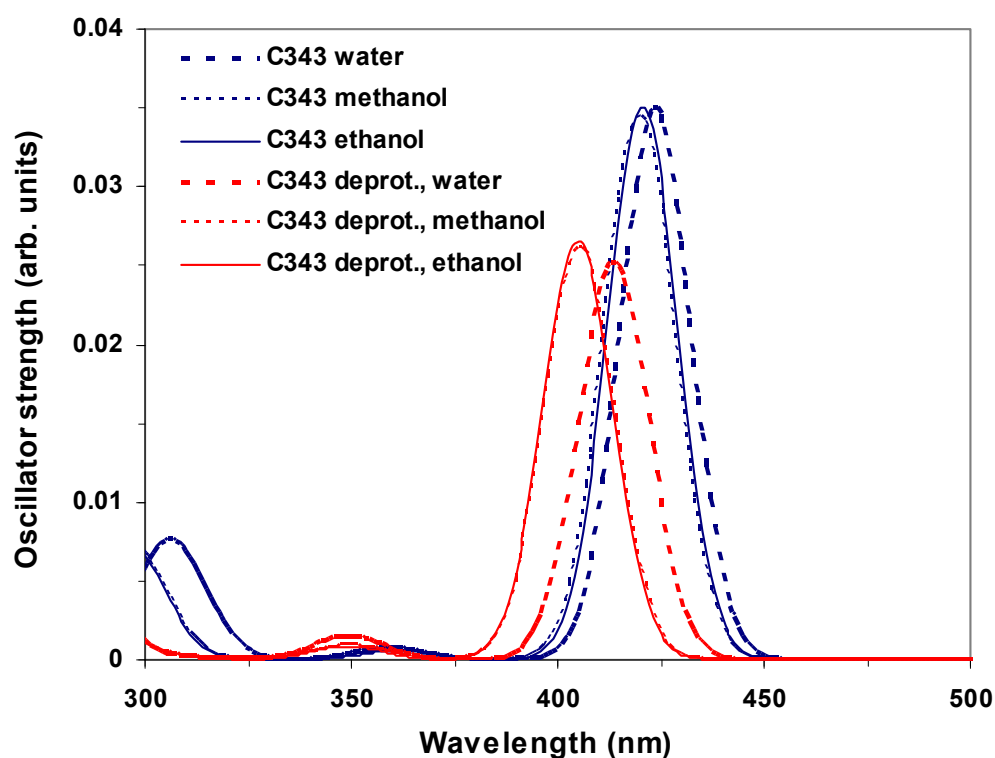

**Figure S2.** Simulated UV-Vis absorption spectra of neutral and deprotonated NKX-2398 dyes, calculated by TD-DFT, in various solvents. The spectral lines were convoluted with Gaussian distributions of 20 nm linewidth at half maximum.

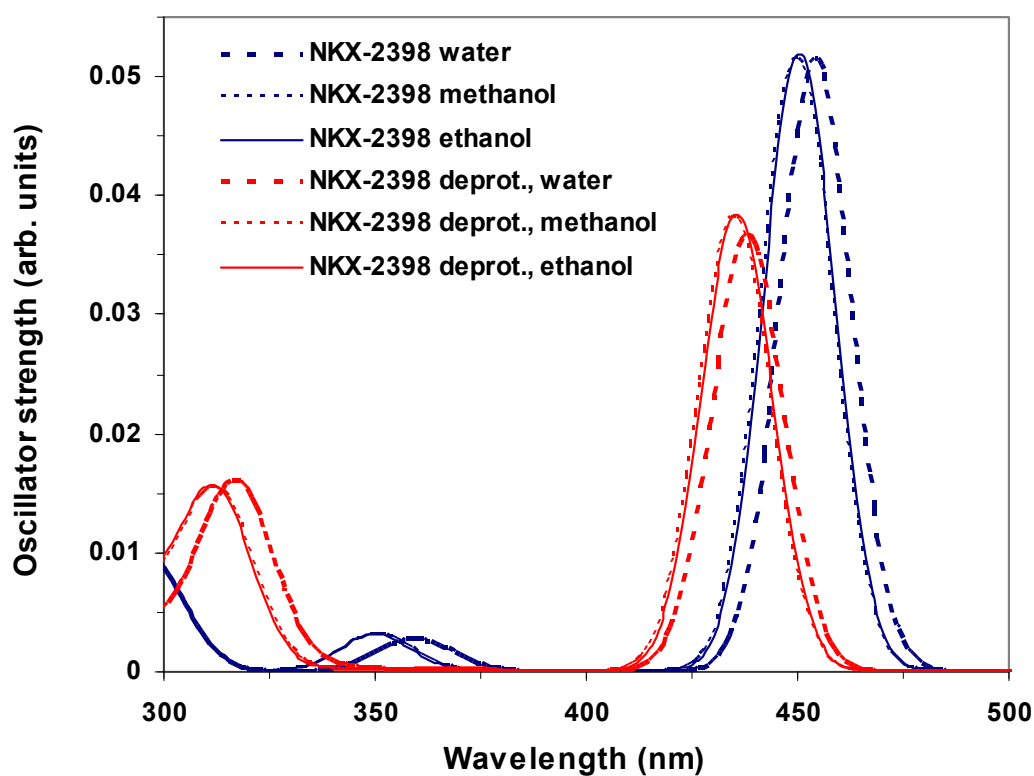

**Figure S3.** Simulated UV-Vis absorption spectra of neutral and deprotonated NKX-2311 dyes, calculated by TD-DFT, in various solvents. The spectral lines were convoluted with Gaussian distributions of 20 nm linewidth at half maximum.

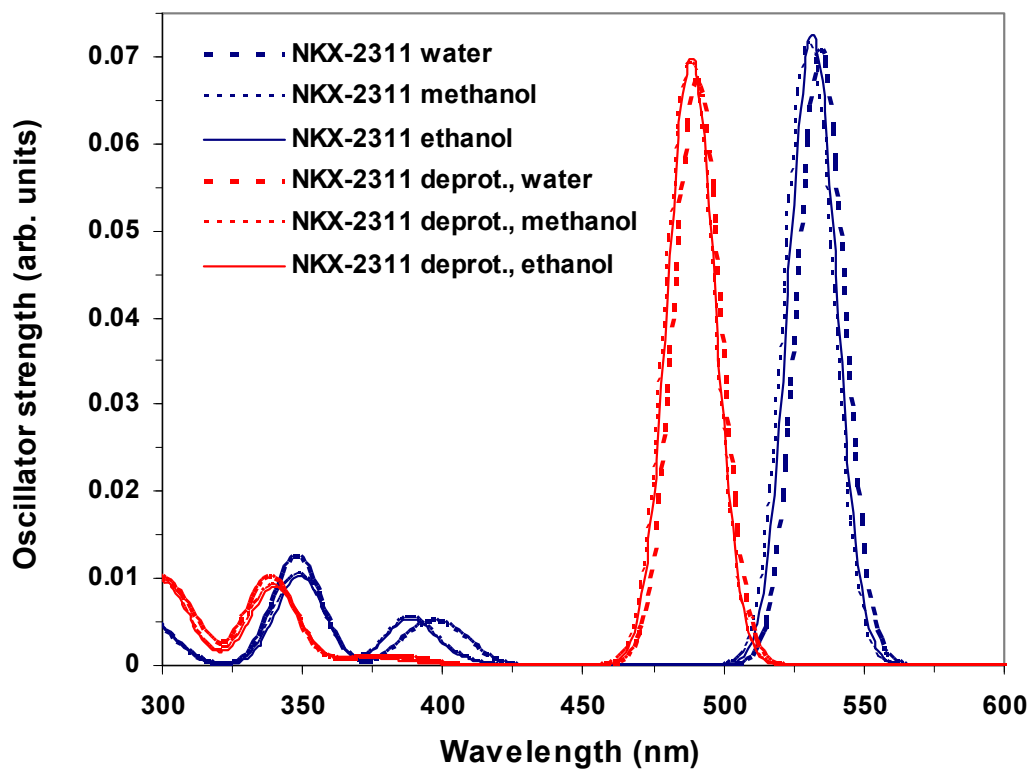

Supplement: Supplementary File 1 [file materials-06-02372-s001.pdf]
